# Supplementary material for: A simple PVA/Cu(OAc)2 thermogel with an inherent near-infrared light response and its applications in smart windows and photoresistors
Source: Royal Society of Chemistry journal article supplement (doi:10.1039/d0ta05036a), 2020-01-01
Supplement: d0ta05036a1.pdf [file d0ta05036a1.pdf]

## Electronic Supplementary Information

# A Simple PVA/Cu(OAc)<sub>2</sub> Thermogel with Inherent Near-Infrared Light Response and Its Applications in Smart Window and Photoresistor

*Hao Zhang,<sup>a</sup> Jie Hao,<sup>b</sup> Xia Yu,<sup>a</sup> Jianqiao Wu,<sup>a</sup> Jiawei Li,<sup>a</sup> Min-Hui Li,<sup>c</sup> and Jun Hu<sup>\*a</sup>*

<sup>a</sup> Beijing Advanced Innovation Center for Soft Matter Science and Engineering, Beijing University of Chemical Technology, North Third Ring Road 15, Chaoyang District, Beijing 100029, China.

<sup>b</sup> Aerospace Research Institute of Special Material and Processing Technology, Yungang Beili, Court No.10, Fengtai District, Beijing 100074, China

<sup>c</sup> Chimie ParisTech, PSL University Paris, CNRS, Institut de Recherche de Chimie Paris, 11 rue Pierre et Marie Curie, Paris 75005, France.

### **\*Corresponding Authors**

Email: [jhu@mail.buct.edu.cn](mailto:jhu@mail.buct.edu.cn) (Jun Hu)

The supporting information includes 8 pages and 15 figures.

## Contents

|                                                                                                                                        |         |
|----------------------------------------------------------------------------------------------------------------------------------------|---------|
| 1. Optical photographs of PVA/Cu(OAc) <sub>2</sub> solution upon heating/cooling at different temperatures .....                       | Page S3 |
| 2. Optical photographs of PVA/Cu(OAc) <sub>2</sub> solution after 100 heating/cooling cycles.....                                      | Page S3 |
| 3. Optical photographs of PVA/metal acetate solutions before and after NIR irradiation ..                                              | Page S4 |
| 4. Optical photographs of PVA/Cu(II) anion solutions before and after NIR irradiation .....                                            | Page S4 |
| 5. Photothermal effect for PVA/Cu(OAc) <sub>2</sub> and water upon NIR light irradiation .....                                         | Page S5 |
| 6. Optical photograph of PVA/Cu(OAc) <sub>2</sub> hydrogel with addition of NaOH.....                                                  | Page S5 |
| 7. Changes of solution state upon heating at 80°C .....                                                                                | Page S5 |
| 8. TEM images of (a) PVA and (b) Cu(OAc) <sub>2</sub> after heating at 80°C for 15 min.....                                            | Page S6 |
| 9. Temperature-dependent UV-vis spectra of PVA/Cu(OAc) <sub>2</sub> solution .....                                                     | Page S6 |
| 10. <sup>1</sup> H NMR spectra of PVA/Cu(OAc) <sub>2</sub> solutions as increasing the molar ratio of Cu <sup>2+</sup> /hydroxyl ..... | Page S6 |
| 11. Temperature-dependent <sup>1</sup> H NMR spectra of PVA solution .....                                                             | Page S7 |
| 12. Transmittance variation of PVA/Cu(OAc) <sub>2</sub> solution as a function of temperature .....                                    | Page S7 |
| 13. The fabrication process of PVA/Cu(OAc) <sub>2</sub> window.....                                                                    | Page S8 |
| 14. Time-dependent top surface temperature changes of PVA/Cu(OAc) <sub>2</sub> window.....                                             | Page S8 |
| 15. The schematic illustration and photograph of the PVA/Cu(OAc) <sub>2</sub> photoresistor.....                                       | Page S8 |



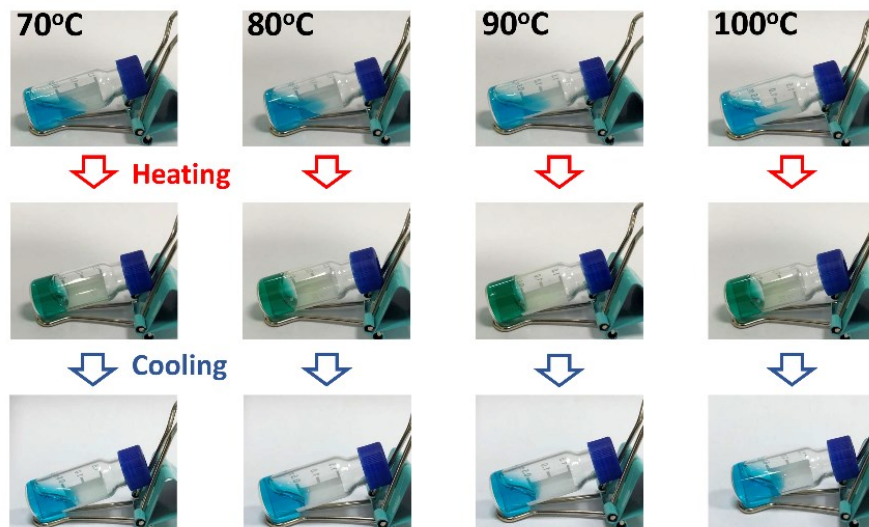

**Fig. S1** Optical photographs of PVA/Cu(OAc)<sub>2</sub> thermogel at 70, 80, 90 and 100°C, respectively, as well as its recover to solution after cooling to room temperature.

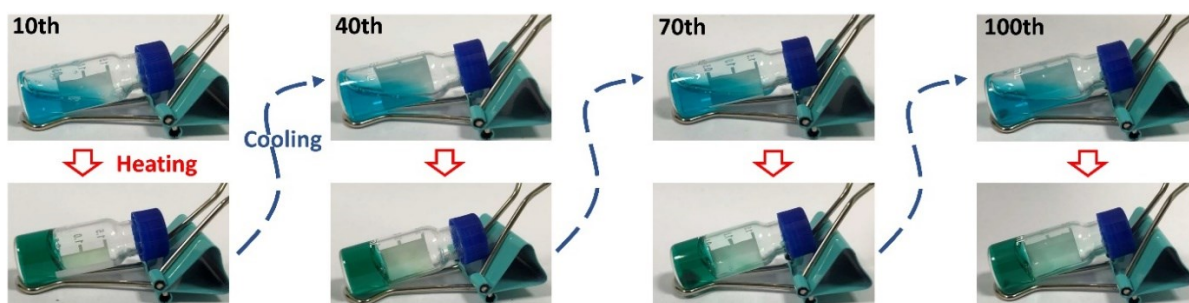

**Fig. S2** Optical photographs of gel-sol transitions of PVA/Cu(OAc)<sub>2</sub> upon 100 heating/cooling cycles.

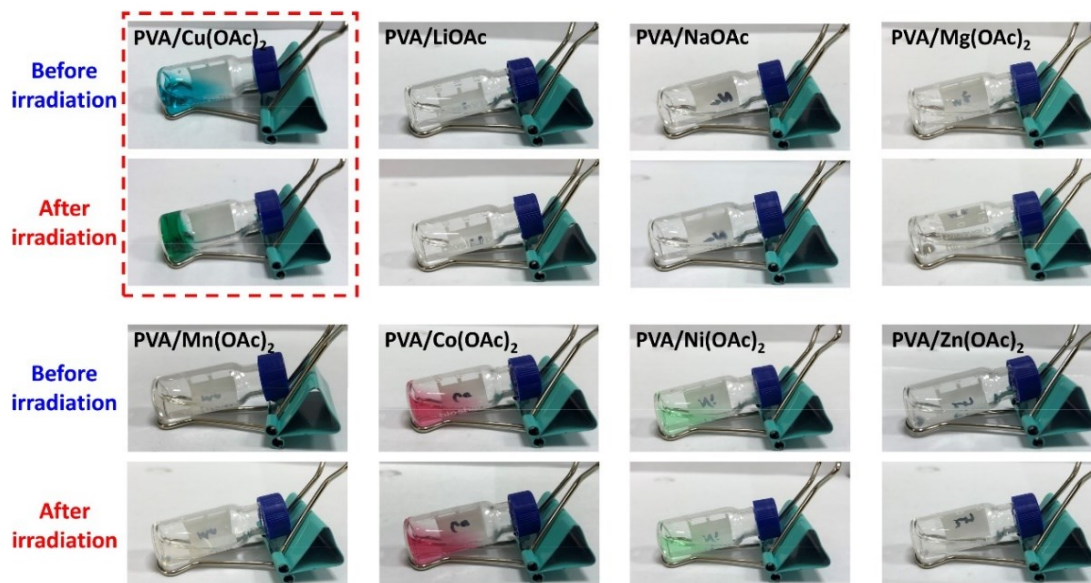

**Fig. S3** Optical photographs of PVA/metal acetate ( $\text{Cu}^{2+}$ ,  $\text{Li}^+$ ,  $\text{Na}^+$ ,  $\text{Mg}^{2+}$ ,  $\text{Mn}^{2+}$ ,  $\text{Co}^{2+}$ ,  $\text{Ni}^{2+}$ ,  $\text{Zn}^{2+}$ ) solutions before and after irradiation of NIR light at 808 nm.

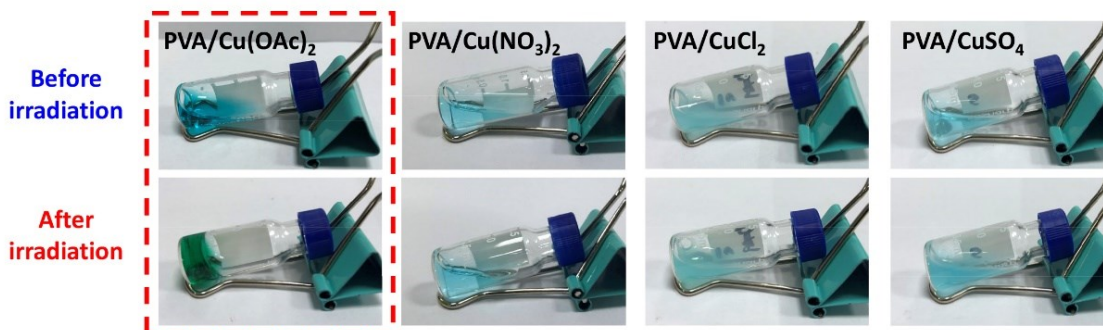

**Fig. S4** Optical photographs of PVA/Cu(OAc)<sub>2</sub>, PVA/Cu(NO<sub>3</sub>)<sub>2</sub>, PVA/CuCl<sub>2</sub>, and PVA/CuSO<sub>4</sub> solutions before and after irradiation of NIR light at 808 nm.

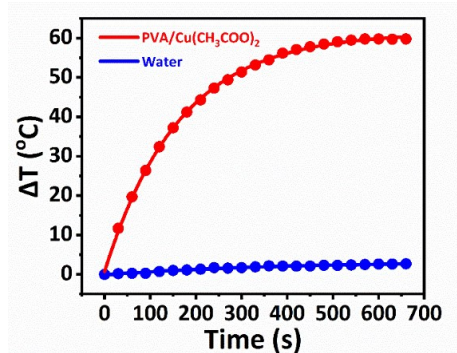

**Fig. S5** Photothermal effect of PVA/Cu(OAc)<sub>2</sub> solutions and water upon NIR light irradiation.

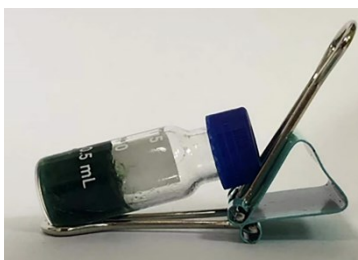

**Fig. S6** Optical photograph of PVA/Cu(OAc)<sub>2</sub> hydrogel with addition of NaOH (concentration was 0.1 M) at 25°C.

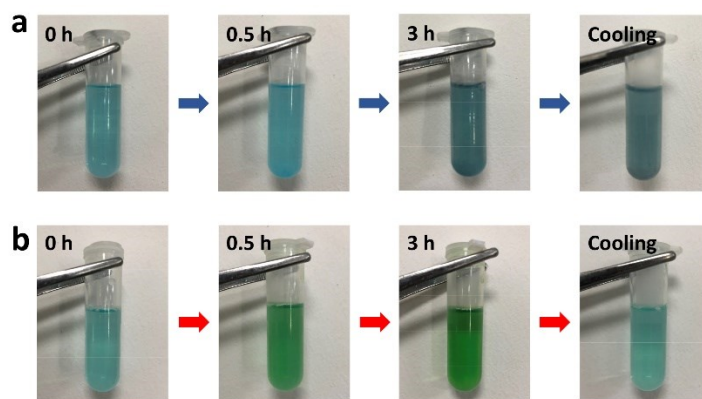

**Fig. S7** Optical photographs of (a) Cu(OAc)<sub>2</sub> and (b) PVA/Cu(OAc)<sub>2</sub> solution upon heating at 80°C (concentration of PVA was 1.0%, and the molar ratio of hydroxyl group/Cu<sup>2+</sup> was 20/3).

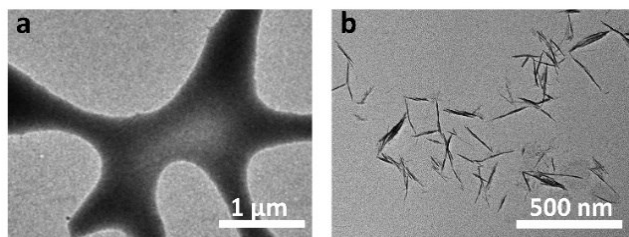

**Fig. S8** TEM images of (a) PVA and (b)  $\text{Cu}(\text{OAc})_2$  solutions upon heating at  $80^\circ\text{C}$  for 15 min.

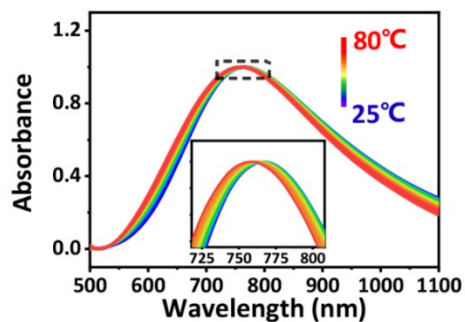

**Fig. S9** Temperature-dependent UV-vis spectra of PVA/ $\text{Cu}(\text{OAc})_2$  solution (concentration of PVA was 1.25%, and the molar ratio of hydroxyl group/ $\text{Cu}^{2+}$  was 20/3).

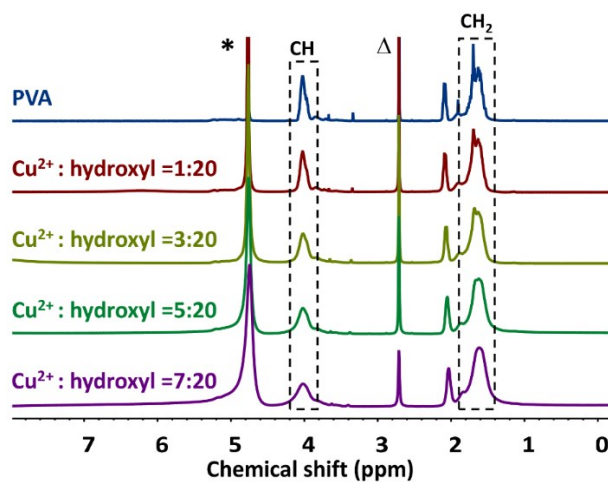

**Fig. S10**  $^1\text{H}$  NMR spectra (400 MHz,  $\text{D}_2\text{O}$ ) of PVA/ $\text{Cu}(\text{OAc})_2$  solution as increasing the molar ratio of  $\text{Cu}^{2+}$ /hydroxyl group from 0/20 to 7/20 at  $25^\circ\text{C}$ . \* and  $\Delta$  represent  $\text{D}_2\text{O}$  and  $\text{DMSO}-d_6$ , respectively.



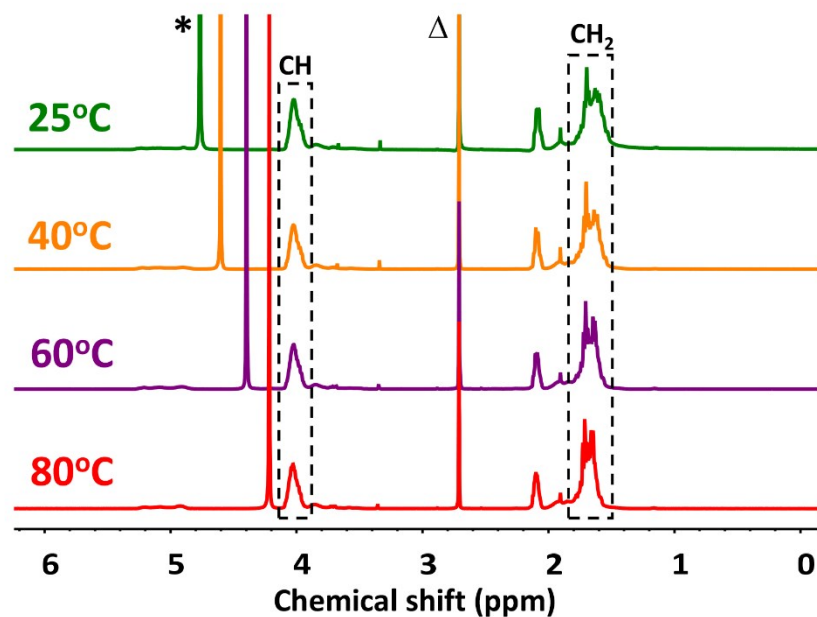

**Fig. S11** Temperature-dependent <sup>1</sup>H NMR spectra (400 MHz, D<sub>2</sub>O) of PVA solution. \* and Δ represent the <sup>1</sup>H NMR peak of D<sub>2</sub>O and DMSO-*d*<sub>6</sub>.

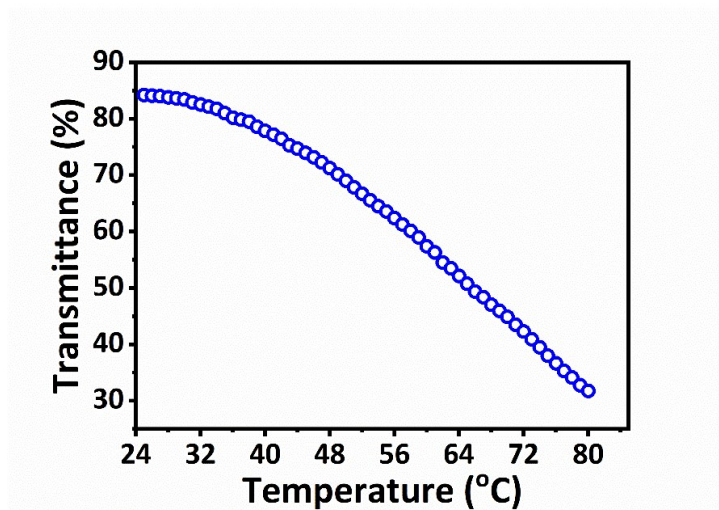

**Fig. S12** Transmittance variation of PVA/Cu(OAc)<sub>2</sub> solution as a function of temperature at 485 nm.



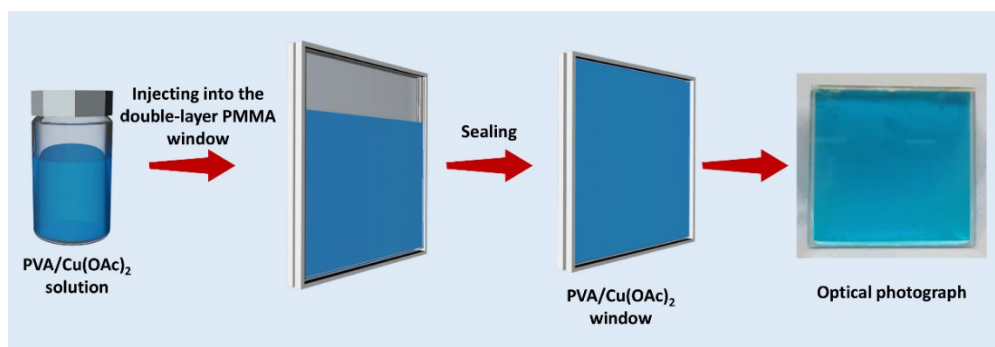

**Fig. S13** The fabrication process and optical photograph of PVA/Cu(OAc)<sub>2</sub> window.

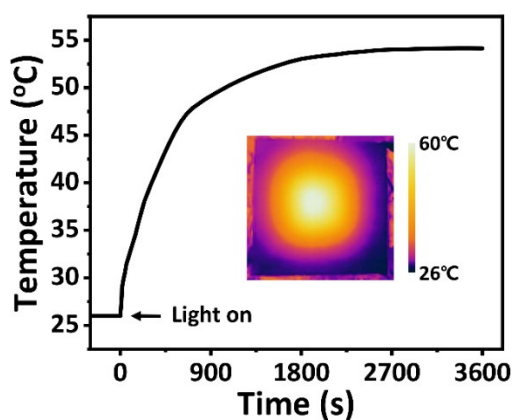

**Fig. S14** Time-dependent top surface temperatures of PVA/Cu(OAc)<sub>2</sub> window. Inset is the IR thermal image of PVA/Cu(OAc)<sub>2</sub> window under 1000 W m<sup>-2</sup> sunlight irradiation.

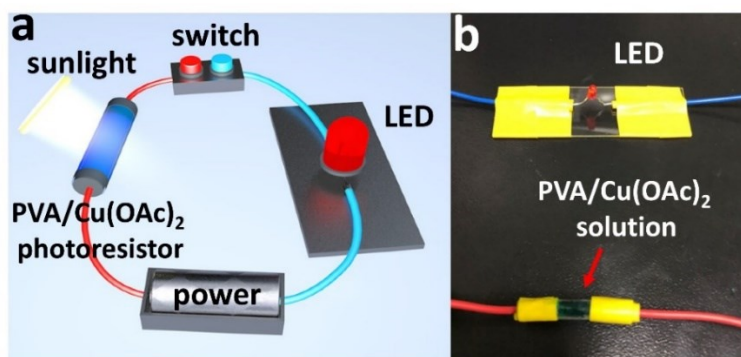

**Fig. S15** (a) Schematic illustration and (b) photograph of the PVA/Cu(OAc)<sub>2</sub> photoresistor connected into a circuit.
